# Supplementary material for: Silica nanostructures synthesis and CdTe quantum dots immobilization for photocatalytical applications
Source: Royal Society of Chemistry journal article supplement (doi:10.1039/c4ra09748c), 2014-01-01
Supplement: c4ra09748c1.pdf [file c4ra09748c1.pdf]

## Supplementary Information

Title: Silica nanostructures synthesis and CdTe quantum dots immobilization for photocatalytical applications

Authors: Marieta L. C. Passos, Mariana Pereira, M. Lúcia M. F. S. Saraiva\*, Maria Rangel, Tania Moniz, João L. M. Santos and Christian Frigerio

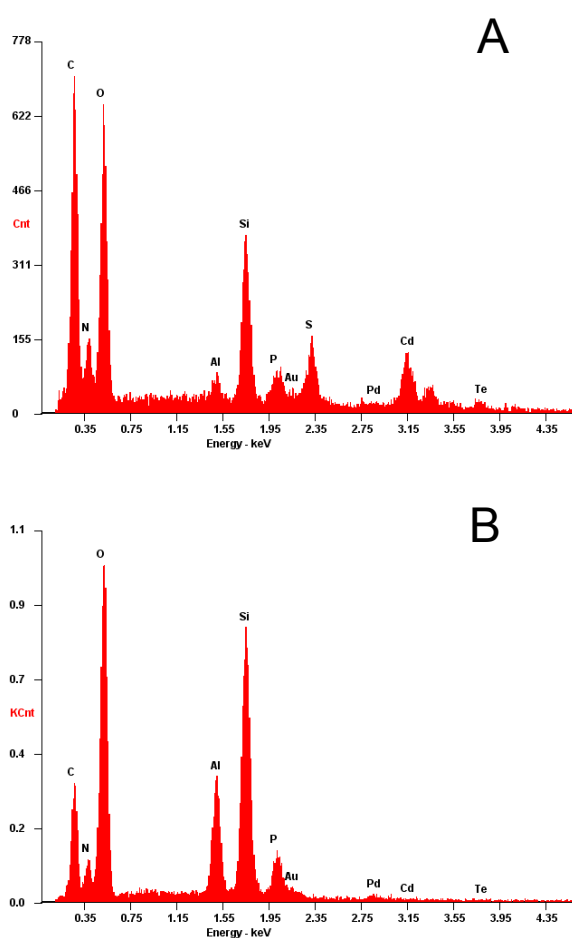

Fig. 1. Elemental analysis, of synthesized nanoparticles with (A) and without (B) encapsulated QDs, by electron diffraction x-ray spectroscopy (EDS).
